# Supplementary material for: ClC-7 Regulates the Pattern and Early Development of Craniofacial Bone and Tooth
Source: PubMed Central journal article supplement — Theranostics. 2019 Feb 20;9(5):1387–400. doi: 10.7150/thno.29761 (PMC6401512; doi:10.7150/thno.29761), 2019-02-20
Supplement: thnov09p1387s1.pdf [file thnov09p1387s1.pdf]

**Supplementary Table 1 Primer sequences of real-time PCR**

| <b>Gene Name</b> | <b>Forward primer (5'–3')</b> | <b>Reverse primer (5'–3')</b> | <b>Accession number</b> | <b>PCR product size (bp)</b> |
|------------------|-------------------------------|-------------------------------|-------------------------|------------------------------|
| <i>actin</i>     | GGTATTGTGATGGACTCTGGTGA       | TCGGCTGTGGTGGTGAAG            | NM_131031               | 167                          |
| <i>clcn7</i>     | TCATATAGGCAGGCTGAGCAC         | GTCCTGCAAGGTTCTCCACA          | NM_001077537            | 296                          |
| <i>sp7</i>       | TCCGTATCCATCCGTAGGCT          | TTTACCGTACACCTTCCCGC          | NM_212863               | 298                          |
| <i>coll10a1</i>  | CTCCGTGAAAAGCCATGTTGT         | TTGCCTGTTGCAGAAATGCC          | NM_001083827            | 324                          |
| <i>cx43</i>      | TGGCGCATGTCTTCTACCTG          | AGAGAGGCTGAAGCCGTAGA          | NM_131038               | 269                          |
| <i>dlx2b</i>     | CCGCTGTTCTGGATAGCCTT          | GCTGGCTCCATACGTTCCAT          | NM_131297               | 290                          |
| <i>eve1</i>      | TTCACGAGGGAACAGCTGAC          | TTCGGGTCCAGTGGATTTGG          | NM_131114               | 194                          |
| <i>ctsk</i>      | TAGATGCCATGCAGTCCACC          | TTCGGTTACGAGCCATCAGG          | NM_001017778            | 201                          |
| <i>bmp2b</i>     | CAAGCAAATCGGCAGTGGTC          | TCTCCGAGAACTTGGTCCCT          | NM_131360               | 292                          |
| <i>bmpr1aa</i>   | GCCACCGTATCCAACAGAT           | GCACCAGGTCTGATCCAACA          | NM_131621               | 280                          |
| <i>bmpr1ab</i>   | ATTTTGGAACGCCCACTTGC          | ATAAAGGCCTCAATCGGCC           | NM_001004585            | 153                          |
| <i>bmpr1ba</i>   | GCGCTACAGTCTCGGTCTAC          | GGCCTCCTCTGTGGTAAAA           | NM_131457               | 247                          |
| <i>bmpr1bb</i>   | GCAGGACTGATGGTTACTGCT         | ACCAATCCTGCGGTTTGTAAC         | NM_001114924            | 239                          |
| <i>bmpr2a</i>    | ACAACAACAGTCGTCACGGA          | TGTCTCCAGAGCTTTTGACCT         | NM_001039817            | 200                          |
| <i>bmpr2b</i>    | AAATCGTCTGGTACGGCCTG          | TCAAAGGACGGGTGGTTTCC          | NM_001039807            | 261                          |
| <i>tgfb1a</i>    | GTCCGAGATGAAGCGCAGTA          | TCAAATGAGAGCCAGCGGTT          | NM_182873               | 189                          |
| <i>tgfb1b</i>    | TGTGACGTCCACCCTGAAAG          | CGTTTTCTGCGGATTTTGC           | XM_687246               | 240                          |
| <i>tgfbr1a</i>   | TGAACAGGTACACGGTCACG          | GCACCTCAGGGGCCATATAC          | NM_001037683            | 276                          |
| <i>tgfbr1b</i>   | GAGTCGGCACCAAACGGTAT          | CTGCCATCTGTTGGGGATGT          | NM_001115059            | 263                          |
| <i>tgfbr2a</i>   | ATGTCTGCTTCTCCGCAC            | AGCATCGGCTTTAGTGGGTC          | XM_009293931            | 209                          |
| <i>tgfbr2b</i>   | TTGTCTCTGTGACTTCGGGC          | CCGATGGCGTTACATCTGGA          | NM_182855               | 216                          |
| <i>tgfbr3</i>    | ATGCAGGTGTCAAAGACGGT          | TCCATAGGCAGGAAGGGGAA          | NM_001311172            | 284                          |
| <i>tgfbrap1</i>  | CAGAAGCACAGTCAAGCCCT          | AGTGTGCTCGCTCAAGTAG           | NM_001083554            | 269                          |
| <i>Gapdh</i>     | CATGTTCCAGTATGACTCCACTC       | GGCCTCACCCATTTGATGT           | NM_001289726            | 136                          |
| <i>Clcn7</i>     | GACAACAGCGAGAATCAGCTC         | CCAATGAGGGCACAGATAACC         | NM_011930.3             | 104                          |
| <i>Tgfb1</i>     | CCGCAACAACGCCATCTATG          | CTCTGCACGGGACAGCAAT           | NM_011577.2             | 118                          |
| <i>Tgfbr1</i>    | GCTGACATCTATGCAATGGG          | TTTCTTCAACCGATGGATCA          | NM_001312869.1          | 127                          |
| <i>Tgfbr2</i>    | CCGCTGCATATCGTCCTGTG          | AGTGGATGGATGGTCCTATTACA       | NM_009371.3             | 131                          |
| <i>Tgfbr3</i>    | CCCTGCATCTGAACCCATT           | CACAGAACCCTCCGAAACCA          | NM_011578.4             | 152                          |
| <i>Bmp2</i>      | CCGCTGTCTTCTAGTGTGCT          | TCTCTGCTTCAGGCCAAACAT         | NM_007553.3             | 181                          |
| <i>Bmpr1a</i>    | GATGGTTCGGCAGGTTGGTA          | ACGCATTAACACCGTCTGGT          | NM_009758.4             | 148                          |
| <i>Bmpr1b</i>    | CTCCCTCTGCTGGTCCAAAG          | GCTTCCTCCGTGGTGAAGAA          | NM_001277217.2          | 143                          |
| <i>Bmpr2</i>     | TGGTGAGGATACCAGGCTGA          | ACCAAACGATCCAGAACCCC          | NM_007561.4             | 108                          |
| <i>Ctsk</i>      | TACCCATATGTGGGCCAGGA          | TTCAGGGCTTTCTCGTTCCC          | NM_007802.4             | 107                          |
| <i>Smad1</i>     | GCTTCGTGAAGGGTTGGGG           | CGGATGAAATAGGATTGTGGGG        | NM_008539.4             | 147                          |
| <i>Smad2</i>     | AAGCCATCACCCTCAGAATTG         | CACTGATCTACCGTATTTGCTGT       | NM_001252481.1          | 100                          |

**Supplementary Table 2 Primer sequences of WISH probes**

| <b>Gene name</b> | <b>Forward primer (5'–3')</b> | <b>Reverse primer (5'–3')</b> | <b>Accession number</b> | <b>PCR product size (bp)</b> |
|------------------|-------------------------------|-------------------------------|-------------------------|------------------------------|
| <i>cln7</i>      | AACAGACAGTTATCCGGGGG          | TATCACTGTCAAAGCGGCCA          | NM_001077537            | 864                          |
| <i>sp7</i>       | GACCCTCACTGGACTGCTTC          | CGGCATTTGAGGATTGAGCG          | NM_212863               | 633                          |
| <i>col10a1</i>   | GCAGTACCAGCCTTACTCCG          | AGGTAAACCAACTCCAGGCG          | NM_001083827            | 535                          |
| <i>cx43</i>      | TGAGGTGGTCTTCCTGGTCA          | TCAGTCCTCTAGCGTTGGGA          | NM_131038               | 682                          |
| <i>dlx2b</i>     | AGCACCGTTCACAAGTCACA          | TGCTCTGAAACTGTGTCCCC          | NM_131297               | 617                          |
| <i>eve1</i>      | CATAAACGAACTTGGCTTGGA         | TGTCTGGACGGGGGAATAG           | NM_131114               | 701                          |

1 **Supplementary References**

- 2 1. Al-Aama JY, Dabbagh AA, Edrees AY. A newly described mutation of the CLCN7 gene  
3 causes neuropathic autosomal recessive osteopetrosis in an Arab family. *Clin Dysmorphol.*  
4 2012;21:1-7.
- 5 2. Albuquerque MA, Melo ES, Jorge WA, Cavalcanti MG. Osteomyelitis of the mandible  
6 associated with autosomal dominant osteopetrosis: a case report. *Oral Surg Oral Med Oral*  
7 *Pathol Oral Radiol Endod.* 2006;102:94-8.
- 8 3. Balan A, Girija KL, Ranimol P. Osteomyelitis of maxilla in infantile osteopetrosis: a case  
9 report with review of literature. *Int J Clin Pediatr Dent.* 2011;4:125-8.
- 10 4. Batra P, Shah N. Recalcitrant osteomyelitis following tooth extraction in a case of malignant  
11 osteopetrosis. *Int Dent J.* 2004;54:418-23.
- 12 5. Besbas N, Draaken M, Ludwig M, Deren O, Orhan D, Bilginer Y, et al. A novel CLCN7  
13 mutation resulting in a most severe form of autosomal recessive osteopetrosis. *Eur J Pediatr.*  
14 2009;168:1449-54.
- 15 6. Celakil T, Dogan M, Rohlig BG, Evlioglu G, Keskin H. Oral rehabilitation of an osteopetrosis  
16 patient with osteomyelitis. *Case Rep Dent.* 2016;2016:6930567.
- 17 7. Curran AE, Pfeffle RC, Miller E. Autosomal dominant osteosclerosis: report of a kindred. *Oral*  
18 *Surg Oral Med Oral Pathol Oral Radiol Endod.* 1999;87:600-4.
- 19 8. Elster AD, Theros EG, Key LL, Chen MY. Cranial imaging in autosomal recessive  
20 osteopetrosis. Part I. Facial bones and calvarium. *Radiology.* 1992;183:129-35.
- 21 9. Eppley BL, Coleman JR. Free fibular flap reconstruction in mandibular osteopetrosis. *J*  
22 *Craniofac Surg.* 2001;12:369-72.

- 1 10. Francisco JV, Reichman L. Osteopetrosis with a complicating osteomyelitis of the mandible.  
2 Report of a case. *Oral Surg Oral Med Oral Pathol.* 1965;19:462-5.
- 3 11. Frattini A, Pangrazio A, Susani L, Sobacchi C, Mirolo M, Abinun M, et al. Chloride channel  
4 CLCN7 mutations are responsible for severe recessive, dominant, and intermediate osteopetrosis.  
5 *J Bone Miner Res.* 2003;18:1740-7.
- 6 12. Gillani S, Abbas Z. Malignant infantile osteopetrosis. *J Ayub Med Coll Abbottabad.*  
7 2017;29:350-2.
- 8 13. Gomes MF, Rangel DC, Starling CC, Goulart M. Familial malignant osteopetrosis in children:  
9 a case report. *Spec Care Dentist.* 2006;26:106-10.
- 10 14. Jayachandran S, Kumar MS. A paradoxical presentation of rickets and secondary osteomyelitis  
11 of the jaw in Type II autosomal dominant osteopetrosis: Rare case reports. *Indian J Dent Res.*  
12 2016;27:667-71.
- 13 15. Junquera L, Rodriguez-Recio C, Villarreal P, Garcia-Consuegra L. Autosomal dominant  
14 osteopetrosis and maxillomandibular osteomyelitis. *Am J Otolaryngol.* 2005;26:275-8.
- 15 16. Kantaputra PN, Thawanaphong S, Issarangporn W, Klanginsirikul P, Ohazama A, Sharpe P, et  
16 al. Long-term survival in infantile malignant autosomal recessive osteopetrosis secondary to  
17 homozygous p.Arg526Gln mutation in CLCN7. *Am J Med Genet A.* 2012;158A:909-16.
- 18 17. Krithika C, Neelakandan RS, Sivapathasundaram B, Koteeswaran D, Rajaram PC, Shetkar GS.  
19 Osteopetrosis-associated osteomyelitis of the jaws: a report of 4 cases. *Oral Surg Oral Med Oral*  
20 *Pathol Oral Radiol Endod.* 2009;108:e56-65.
- 21 18. Kulyapina A, Verdaguer MJ, Navarro CC, Navarro VC. Long-term follow-up of bimaxillary  
22 osteomyelitis associated with autosomal dominant osteopetrosis: a case report. *J Maxillofac*

- 1 Oral Surg. 2016;15:121-6.
- 2 19. Lawoyin DO, Daramola JO, Ajagbe HA, Nyako EA, Lawoyin JO. Osteomyelitis of the  
3 mandible associated with osteopetrosis: report of a case. Br J Oral Maxillofac Surg.  
4 1988;26:330-5.
- 5 20. Lin WD, Wang CH, Wu KH, Chou IC, Tsai FJ. Identification and characterization of mutations  
6 in the CLCN7 gene in a taiwanese patient with infantile malignant osteopetrosis. Pediatr  
7 Neonatol. 2016;57:155-7.
- 8 21. Liu YP, Lin XH, Yan MY, Lin BQ, Zhuo MY. Debridement in chronic osteomyelitis with  
9 benign osteopetrosis: A case report. Exp Ther Med. 2016;12:2811-4.
- 10 22. Mainous EG, Hart GB, Soffa DJ, Graham GA. Hyperbaric oxygen treatment of mandibular  
11 osteomyelitis in osteopetrosis. J Oral Surg. 1975;33:288-91.
- 12 23. Nitzan DW, Marmary Y. Osteomyelitis of the mandible in a patient with osteopetrosis. J Oral  
13 Maxillofac Surg. 1982;40:377-80.
- 14 24. Ogutcen-Toller M, Tek M, Sener I, Bereket C, Inal S, Ozden B. Intractable bimaxillary  
15 osteomyelitis in osteopetrosis: review of the literature and current therapy. J Oral Maxillofac  
16 Surg. 2010;68:167-75.
- 17 25. Pang Q, Chi Y, Zhao Z, Xing X, Li M, Wang O, et al. Novel mutations of CLCN7 cause  
18 autosomal dominant osteopetrosis type II (ADO-II) and intermediate autosomal recessive  
19 osteopetrosis (IARO) in Chinese patients. Osteoporos Int. 2016;27:1047-55.
- 20 26. Phadke SR, Fischer B, Gupta N, Ranganath P, Kabra M, Kornak U. Novel mutations in Indian  
21 patients with autosomal recessive infantile malignant osteopetrosis. Indian J Med Res.  
22 2010;131:508-14.

- 1 27. Rashid BM, Rashid NG, Schulz A, Lahr G, Nore BF. A novel missense mutation in the CLCN7  
2 gene linked to benign autosomal dominant osteopetrosis: a case series. *J Med Case Rep.*  
3 2013;7:7.
- 4 28. Rehani U, Adlakha VK, Chandna P, Agarwal A, Rana V, Malik P. Prosthetic rehabilitation in  
5 marble bone disease. *Int J Clin Pediatr Dent.* 2010;3:207-10.
- 6 29. Saigal A, Gopal M, Mohanty N, Misra SR. Recurrent osteomyelitis of the mandible in  
7 osteopetrosis: a common complication of an uncommon disease. *BMJ Case Rep.* 2015;  
8 10.1136/2014208974.
- 9 30. Satomura K, Kon M, Tokuyama R, Tomonari M, Takechi M, Yuasa T, et al. Osteopetrosis  
10 complicated by osteomyelitis of the mandible: a case report including characterization of the  
11 osteopetrotic bone. *Int J Oral Maxillofac Surg.* 2007;36:86-93.
- 12 31. Sharma SS, Saravanan C, Sathyabama V, Satish C. Osteopetrosis of the mandible  
13 masquerading as tubercular osteomyelitis. *BMJ Case Rep.* 2013;10.1136/2012007487.
- 14 32. Steiner M, Gould AR, Means WR. Osteomyelitis of the mandible associated with osteopetrosis.  
15 *J Oral Maxillofac Surg.* 1983;41:395-405.
- 16 33. Sun HJ, Xue L, Wu CB, Zhou Q. Clinical characteristics and treatment of osteopetrosis  
17 complicated by osteomyelitis of the mandible. *J Craniofac Surg.* 2016;27:e728-30.
- 18 34. Trivellato AE, Ribeiro MC, Sverzut CE, Bonucci E, Nanci A, de Oliveira PT. Osteopetrosis  
19 complicated by osteomyelitis of the maxilla and mandible: light and electron microscopic  
20 findings. *Head Neck Pathol.* 2009;3:320-6.
- 21 35. Vazquez E, Lopez-Arcas JM, Navarro I, Pingarron L, Cebrian JL. Maxillomandibular  
22 osteomyelitis in osteopetrosis. Report of a case and review of the literature. *Oral Maxillofac*

- 1 Surg. 2009;13:105-8.
- 2 36. Yamada T, Mishima K, Imura H, Ueno T, Matsumura T, Moritani N, et al. Osteomyelitis of the  
3 mandible secondary to infantile osteopetrosis: a case report. *Oral Surg Oral Med Oral Pathol*  
4 *Oral Radiol Endod.* 2009;107:e25-9.
- 5 37. Younai F, Eisenbud L, Sciubba JJ. Osteopetrosis: a case report including gross and microscopic  
6 findings in the mandible at autopsy. *Oral Surg Oral Med Oral Pathol.* 1988;65:214-21.
- 7 38. Yu T, Yu Y, Wang J, Yin L, Zhou Y, Ying D, et al. Identification of TCIRG1 and CLCN7 gene  
8 mutations in a patient with autosomal recessive osteopetrosis. *Mol Med Rep.* 2014;9:1191-6.
- 9 39. Zeng B, Li R, Hu Y, Hu B, Zhao Q, Liu H, et al. A novel mutation and a known mutation in the  
10 CLCN7 gene associated with relatively stable infantile malignant osteopetrosis in a Chinese  
11 patient. *Gene.* 2016;576:176-81.
- 12 40. Zhang ZL, He JW, Zhang H, Hu WW, Fu WZ, Gu JM, et al. Identification of the CLCN7 gene  
13 mutations in two Chinese families with autosomal dominant osteopetrosis (type II). *J Bone*  
14 *Miner Metab.* 2009;27:444-51.
- 15 41. Lu SY, Huang SH, Chen YH. Numb chin with mandibular pain or masticatory weakness as  
16 indicator for systemic malignancy—A case series study. *J Formos Med Assoc.*  
17 2017;116:897-906.
